# Supplementary material for: Metabolic reprogramming of poly(morpho)nuclear giant cells determines glioblastoma recovery from doxorubicin-induced stress
Source: PubMed Central journal article supplement (PMC11318163; doi:10.1186/s12967-024-05541-9), 2024-08-12
Supplement: 12967_2024_5541_MOESM2_ESM.pdf [file 12967_2024_5541_MOESM2_ESM.pdf]

## Appendix 1. Proteomic data

| β-oxidation involved proteins |                                                                                                   |           |             |                 |             |               | DOX_48h vs. Control |             | DOX_R 72h vs. Control |             | DOX_R 7d vs. Control |             | DOX_R 14d vs. Control |             |
|-------------------------------|---------------------------------------------------------------------------------------------------|-----------|-------------|-----------------|-------------|---------------|---------------------|-------------|-----------------------|-------------|----------------------|-------------|-----------------------|-------------|
| ID                            | Protein name                                                                                      | Gene Name | UniProt ID  | Unique peptides | p-value     | ANOVA q-value | Significant         | Fold change | Significant           | Fold change | Significant          | Fold change | Significant           | Fold change |
| Q15067                        | Peroxisomal acyl-coenzyme A oxidase 1, AOX, EC 1.3.3.6                                            | ACOX1     | ACOX1_HUMAN | 17              | 2,196913001 | 0,006292035   | No                  | 1,19        | No                    | 1,17        | Yes                  | 1,46        | Yes                   | 1,26        |
| Q99714                        | 3-hydroxyacyl-CoA dehydrogenase type-2, EC 1.1.1.35                                               | HSD17B10  | HCD2_HUMAN  | 15              | 1,207282792 | 0,046970242   | No                  | 1,06        | No                    | 1,06        | No                   | 1,26        | No                    | 1,17        |
| P11310                        | Medium-chain specific acyl-CoA dehydrogenase, mitochondrial, MCAD, EC 1.3.8.7                     | ACADM     | ACADM_HUMAN | 15              | 1,566422636 | 0,021621446   | No                  | 1,24        | No                    | 1,36        | Yes                  | 1,59        | No                    | 1,30        |
| P42765                        | 3-ketoacyl-CoA thiolase, mitochondrial, EC 2.3.1.16                                               | ACAA2     | THIM_HUMAN  | 19              | 5,429908615 | 0,000457143   | Yes                 | 1,59        | Yes                   | 1,99        | Yes                  | 2,15        | Yes                   | 2,24        |
| P33121                        | Long-chain-fatty-acid-CoA ligase 1, EC 6.2.1.3                                                    | ACSL1     | ACSL1_HUMAN | 16              | 1,716252291 | 0,015808028   | No                  | 1,42        | No                    | 1,30        | Yes                  | 1,70        | Yes                   | 1,71        |
| P42765                        | 3-ketoacyl-CoA thiolase, mitochondrial, EC 2.3.1.16                                               | ACAA2     | THIM_HUMAN  | 19              | 5,429908615 | 0,000457143   | Yes                 | 1,59        | Yes                   | 1,99        | Yes                  | 2,15        | Yes                   | 2,24        |
| Q96CM8                        | Medium-chain acyl-CoA ligase ACSF2, mitochondrial, EC 6.2.1.2                                     | ACSF2     | ACSF2_HUMAN | 14              | 2,802967416 | 0,002472727   | Yes                 | 3,62        | Yes                   | 2,67        | Yes                  | 2,68        | Yes                   | 2,80        |
| P49748                        | Very long-chain specific acyl-CoA dehydrogenase, mitochondrial, VLCAD, EC 1.3.8.9                 | ACADVL    | ACADV_HUMAN | 25              | 5,394596647 | 0,000436364   | Yes                 | 1,65        | Yes                   | 1,55        | Yes                  | 1,56        | Yes                   | 1,74        |
| Krebs Cycle enzymes           |                                                                                                   |           |             |                 |             |               | DOX_48h vs. Control |             | DOX_R 72h vs. Control |             | DOX_R 7d vs. Control |             | DOX_R 14d vs. Control |             |
| ID                            | Protein name                                                                                      | Gene Name | UniProt ID  | Unique peptides | p-value     | ANOVA q-value | Significant         | Fold change | Significant           | Fold change | Significant          | Fold change | Significant           | Fold change |
| P40926                        | Malate dehydrogenase, mitochondrial, EC 1.1.1.37                                                  | MDH2      | MDHM_HUMAN  | 14              | 4,78771387  | 0,000588235   | Yes                 | 1,21        | Yes                   | 1,47        | Yes                  | 1,40        | Yes                   | 1,30        |
| P36957                        | Dihydrolipoylysine-residue succinyltransferase component of 2-oxoglutarate dehydrogenase complex, | DLST      | ODO2_HUMAN  | 8               | 1,22833636  | 0,044753664   | No                  | 1,41        | No                    | 1,18        | No                   | 1,56        | No                    | 1,31        |
| P48735                        | Isocitrate dehydrogenase [NADP], mitochondrial, IDH, EC 1.1.1.42                                  | IDH2      | IDHP_HUMAN  | 23              | 5,999604474 | 0,0005        | Yes                 | 1,33        | Yes                   | 1,28        | Yes                  | 1,36        | Yes                   | 1,26        |
| O43837                        | Isocitrate dehydrogenase [NAD] subunit beta, mitochondrial                                        | IDH3B     | IDH3B_HUMAN | 14              | 3,508906962 | 0,001138824   | Yes                 | 1,32        | Yes                   | 1,55        | Yes                  | 1,23        | No                    | 1,22        |
| P51553                        | Isocitrate dehydrogenase [NAD] subunit gamma, mitochondrial                                       | IDH3G     | IDH3G_HUMAN | 10              | 2,193648846 | 0,006326711   | No                  | 1,02        | No                    | 1,25        | Yes                  | 1,59        | No                    | 1,45        |
| P50213                        | Isocitrate dehydrogenase [NAD] subunit alpha, mitochondrial, EC 1.1.1.41                          | IDH3A     | IDH3A_HUMAN | 12              | 3,659003676 | 0,001068783   | No                  | 1,23        | Yes                   | 1,37        | Yes                  | 1,54        | Yes                   | 1,48        |
| Q99798                        | Aconitate hydratase, mitochondrial, Aconitase, EC 4.2.1.3                                         | ACO2      | ACON_HUMAN  | 40              | 4,9188934   | 0,000525      | Yes                 | 1,50        | Yes                   | 1,72        | Yes                  | 1,95        | Yes                   | 2,06        |
| OXPHOS involved proteins      |                                                                                                   |           |             |                 |             |               | DOX_48h vs. Control |             | DOX_R 72h vs. Control |             | DOX_R 7d vs. Control |             | DOX_R 14d vs. Control |             |
| ID                            | Protein name                                                                                      | Gene Name | UniProt ID  | Unique peptides | p-value     | ANOVA q-value | Significant         | Fold change | Significant           | Fold change | Significant          | Fold change | Significant           | Fold change |
| P28331                        | NADH-ubiquinone oxidoreductase 75 kDa subunit, mitochondrial, EC 7.1.1.2                          | NDUFS1    | NDUS1_HUMAN | 20              | 1,711615705 | 0,016017406   | No                  | -1,02       | No                    | 1,11        | Yes                  | 1,29        | No                    | 1,05        |
| P14927                        | Cytochrome b-c1 complex subunit 7                                                                 | UQCRCB    | QCR7_HUMAN  | 7               | 3,769681249 | 0,000991354   | Yes                 | 1,50        | Yes                   | 1,22        | Yes                  | 1,34        | No                    | 1,21        |
| P47985                        | Cytochrome b-c1 complex subunit Rieske, mitochondrial, EC 7.1.1.8                                 | UQCRCF1   | UCRI_HUMAN  | 9               | 3,22941426  | 0,001533597   | Yes                 | 1,42        | Yes                   | 1,21        | Yes                  | 1,24        | No                    | 1,06        |
| P31930                        | Cytochrome b-c1 complex subunit 1, mitochondrial                                                  | UQCRC1    | QCR1_HUMAN  | 17              | 3,921081081 | 0,000923077   | Yes                 | 1,29        | Yes                   | 1,49        | Yes                  | 1,71        | Yes                   | 1,37        |
| P22695                        | Cytochrome b-c1 complex subunit 2, mitochondrial                                                  | UQCRC2    | QCR2_HUMAN  | 12              | 1,441508648 | 0,028496148   | No                  | 1,10        | No                    | 1,26        | Yes                  | 1,33        | No                    | 1,12        |
| O43169                        | Cytochrome b5 type B                                                                              | CYB5B     | CYB5B_HUMAN | 6               | 2,200078415 | 0,006245847   | No                  | 1,16        | No                    | -1,05       | No                   | 1,39        | Yes                   | 1,35        |
| P31040                        | Succinate dehydrogenase [ubiquinone] flavoprotein subunit, mitochondrial, EC 1.3.5                | SDHA      | SDHA_HUMAN  | 20              | 1,775875046 | 0,014121929   | No                  | 1,30        | No                    | 1,36        | Yes                  | 1,46        | Yes                   | 1,45        |
| Q96IX5                        | ATP synthase membrane subunit K, mitochondrial                                                    | ATP5MK    | ATPMK_HUMAN | 3               | 1,278089971 | 0,0400199     | No                  | 1,00        | No                    | 1,11        | No                   | 1,11        | No                    | 1,14        |
| Q13423                        | NAD(P) transhydrogenase, mitochondrial, EC 7.1.1.1                                                | NNT       | NNTM_HUMAN  | 38              | 4,123530594 | 0,000852941   | No                  | 1,12        | No                    | 1,16        | Yes                  | 1,53        | Yes                   | 1,62        |
| P38117                        | Electron transfer flavoprotein subunit beta, Beta-ETF                                             | ETFB      | ETFB_HUMAN  | 15              | 5,49713171  | 0,000494845   | Yes                 | 1,24        | Yes                   | 1,34        | Yes                  | 1,34        | Yes                   | 1,55        |
| Q9NZ45                        | CDGSH iron-sulfur domain-containing protein 1 (MitoNEET)                                          | CISD1     | CISD1_HUMAN | 6               | 1,548583967 | 0,022599034   | No                  | 1,31        | No                    | 1,42        | No                   | 1,49        | Yes                   | 1,77        |

| Redox homeostasis proteins                 |                                                                        |           |             |                 |             |               | DOX_48h vs. Control |             | DOX_R 72h vs. Control |             | DOX_R 7d vs. Control |             | DOX_R 14d vs. Control |             |
|--------------------------------------------|------------------------------------------------------------------------|-----------|-------------|-----------------|-------------|---------------|---------------------|-------------|-----------------------|-------------|----------------------|-------------|-----------------------|-------------|
| ID                                         | Protein name                                                           | Gene Name | UniProt ID  | Unique peptides | p-value     | ANOVA q-value | Significant         | Fold change | Significant           | Fold change | Significant          | Fold change | Significant           | Fold change |
| P04040                                     | Catalase, EC 1.11.1.6                                                  | CAT       | CATA_HUMAN  | 24              | 4,272142714 | 0,000760331   | Yes                 | 1,52        | Yes                   | 1,31        | Yes                  | 1,50        | Yes                   | 1,66        |
| P04179                                     | Superoxide dismutase [Mn], mitochondrial, EC 1.15.1.1                  | SOD2      | SODM_HUMAN  | 12              | 9,556046184 | 0             | Yes                 | 2,02        | Yes                   | 2,18        | Yes                  | 3,02        | Yes                   | 3,54        |
| P00441                                     | Superoxide dismutase [Cu-Zn], EC 1.15.1.1                              | SOD1      | SODC_HUMAN  | 7               | 1,486187248 | 0,025858934   | Yes                 | 1,33        | No                    | 1,13        | No                   | 1,01        | No                    | 1,13        |
| Q9Y2Q3                                     | Glutathione S-transferase kappa 1, EC 2.5.1.18                         | GSTK1     | GSTK1_HUMAN | 9               | 1,517965539 | 0,024146264   | No                  | 1,17        | Yes                   | 1,34        | No                   | 1,20        | No                    | 1,29        |
| P78417                                     | Glutathione S-transferase omega-1, GSTO-1, EC 2.5.1.18                 | GSTO1     | GSTO1_HUMAN | 21              | 1,720598725 | 0,015750439   | No                  | 1,02        | No                    | 1,08        | Yes                  | 1,19        | No                    | 1,19        |
| P30044                                     | Peroxisome oxidin-5, mitochondrial, EC 1.11.1.24                       | PRDX5     | PRDX5_HUMAN | 14              | 3,735808802 | 0,001042493   | Yes                 | 1,47        | Yes                   | 1,41        | Yes                  | 1,30        | Yes                   | 1,30        |
| P35754                                     | Glutaredoxin-1 (Thioltransferase-1, TTase-1)                           | GLRX      | GLRX1_HUMAN | 4               | 2,938928718 | 0,002246305   | Yes                 | 1,63        | Yes                   | 1,47        | No                   | 1,24        | No                    | 1,24        |
| Q9NUJ1                                     | Palmitoyl-protein thioesterase ABHD10, mitochondrial, EC 3.1.2.22      | ABHD10    | ABHDA_HUMAN | 12              | 2,597486759 | 0,003397333   | Yes                 | 1,44        | Yes                   | 1,40        | Yes                  | 1,30        | Yes                   | 1,45        |
| Q13162                                     | Peroxisome oxidin-4, EC 1.11.1.24 (                                    | PRDX4     | PRDX4_HUMAN | 13              | 3,543575097 | 0,001156863   | No                  | 1,15        | No                    | 1,15        | Yes                  | 1,30        | Yes                   | 1,35        |
| O95571                                     | Persulfide dioxygenase ETHE1, mitochondrial, EC 1.13.11.18             | ETHE1     | ETHE1_HUMAN | 8               | 3,850533863 | 0,000969325   | No                  | 1,06        | No                    | 1,16        | Yes                  | 1,43        | Yes                   | 1,72        |
| Q96C36                                     | Pyrroline-5-carboxylate reductase 2, EC 1.5.1.2                        | PYCR2     | P5CR2_HUMAN | 9               | 3,935752773 | 0,000929032   | Yes                 | 1,62        | Yes                   | 1,65        | No                   | 1,22        | Yes                   | 1,75        |
| P32322                                     | Pyrroline-5-carboxylate reductase 1, mitochondrial, EC 1.5.1.2         | PYCR1     | P5CR1_HUMAN | 11              | 2,778353565 | 0,002542222   | No                  | 1,17        | Yes                   | 1,24        | No                   | 1,17        | Yes                   | 1,30        |
| Doxorubicin metabolizing enzymes           |                                                                        |           |             |                 |             |               | DOX_48h vs. Control |             | DOX_R 72h vs. Control |             | DOX_R 7d vs. Control |             | DOX_R 14d vs. Control |             |
| ID                                         | Protein name                                                           | Gene Name | UniProt ID  | Unique peptides | p-value     | ANOVA q-value | Significant         | Fold change | Significant           | Fold change | Significant          | Fold change | Significant           | Fold change |
| P15121                                     | Aldo-keto reductase family 1 member B1, EC 1.1.1.300                   | AKR1B1    | ALDR_HUMAN  | 22              | 8,128885746 | 0             | Yes                 | 1,65        | Yes                   | 1,65        | Yes                  | 2,13        | Yes                   | 2,13        |
| P14550                                     | Aldo-keto reductase family 1 member A1, EC 1.1.1.2                     | AKR1A1    | AK1A1_HUMAN | 21              | 5,862108398 | 0,000555556   | Yes                 | 1,17        | Yes                   | 1,24        | Yes                  | 1,34        | Yes                   | 1,50        |
| O75828                                     | Carbonyl reductase [NADPH] 3, EC 1.1.1.184                             | CBR3      | CBR3_HUMAN  | 13              | 2,873215705 | 0,002346334   | No                  | 1,21        | No                    | -1,03       | No                   | 1,16        | Yes                   | 1,48        |
| P16152                                     | Carbonyl reductase [NADPH] 1, EC 1.1.1.184                             | CBR1      | CBR1_HUMAN  | 13              | 2,809274101 | 0,00245827    | No                  | 1,05        | No                    | 1,06        | No                   | 1,03        | Yes                   | 1,29        |
| NAD(P)H homeostasis proteins               |                                                                        |           |             |                 |             |               | DOX_48h vs. Control |             | DOX_R 72h vs. Control |             | DOX_R 7d vs. Control |             | DOX_R 14d vs. Control |             |
| ID                                         | Protein name                                                           | Gene Name | UniProt ID  | Unique peptides | p-value     | ANOVA q-value | Significant         | Fold change | Significant           | Fold change | Significant          | Fold change | Significant           | Fold change |
| Q13423                                     | NAD(P) transhydrogenase, mitochondrial, EC 7.1.1.1                     | NNT       | NNTM_HUMAN  | 38              | 4,123530594 | 0,000852941   | No                  | 1,12        | No                    | 1,16        | Yes                  | 1,53        | Yes                   | 1,62        |
| P48735                                     | Isocitrate dehydrogenase [NADP], mitochondrial, IDH, EC 1.1.1.42       | IDH1      | IDHP_HUMAN  | 23              | 5,999604474 | 0,0005        | Yes                 | 1,33        | Yes                   | 1,28        | Yes                  | 1,36        | Yes                   | 1,26        |
| Q8NCW5                                     | NAD(P)H-hydrate epimerase, EC 5.1.99.6                                 | NAXE      | NNRE_HUMAN  | 12              | 2,886702261 | 0,002333333   | No                  | 1,23        | Yes                   | 1,35        | Yes                  | 1,51        | Yes                   | 1,50        |
| Senescence involved proteins               |                                                                        |           |             |                 |             |               | DOX_48h vs. Control |             | DOX_R 72h vs. Control |             | DOX_R 7d vs. Control |             | DOX_R 14d vs. Control |             |
| ID                                         | Protein name                                                           | Gene Name | UniProt ID  | Unique peptides | p-value     | ANOVA q-value | Significant         | Fold change | Significant           | Fold change | Significant          | Fold change | Significant           | Fold change |
| P16278                                     | Beta-galactosidase, EC 3.2.1.23                                        | GLB1      | BGAL_HUMAN  | 13              | 2,862544691 | 0,002354037   | No                  | 1,47        | No                    | 1,38        | Yes                  | 1,76        | Yes                   | 2,25        |
| ATP/ADP homeostasis management             |                                                                        |           |             |                 |             |               | DOX_48h vs. Control |             | DOX_R 72h vs. Control |             | DOX_R 7d vs. Control |             | DOX_R 14d vs. Control |             |
| ID                                         | Protein name                                                           | Gene Name | UniProt ID  | Unique peptides | p-value     | ANOVA q-value | Significant         | Fold change | Significant           | Fold change | Significant          | Fold change | Significant           | Fold change |
| Q9UIJ7                                     | GTP:AMP phosphotransferase AK3, mitochondrial, EC 2.7.4.10             | AK3       | KAD3_HUMAN  | 15              | 3,397917927 | 0,001306667   | Yes                 | 1,85        | Yes                   | 1,62        | Yes                  | 1,60        | Yes                   | 1,88        |
| P54819                                     | Adenylate kinase 2, mitochondrial, AK 2, EC 2.7.4.3                    | AK2       | KAD2_HUMAN  | 11              | 2,1044092   | 0,007457052   | Yes                 | 1,34        | Yes                   | 1,26        | No                   | 1,20        | No                    | 1,03        |
| P00568                                     | Adenylate kinase isoenzyme 1, AK 1, EC 2.7.4.3                         | AK1       | KAD1_HUMAN  | 7               | 1,387759523 | 0,031738542   | Yes                 | 1,37        | No                    | 1,19        | No                   | 1,24        | No                    | 1,12        |
| Unsaturated fatty acids $\beta$ -oxidation |                                                                        |           |             |                 |             |               | DOX_48h vs. Control |             | DOX_R 72h vs. Control |             | DOX_R 7d vs. Control |             | DOX_R 14d vs. Control |             |
| ID                                         | Protein name                                                           | Gene Name | UniProt ID  | Unique peptides | p-value     | ANOVA q-value | Significant         | Fold change | Significant           | Fold change | Significant          | Fold change | Significant           | Fold change |
| Q13011                                     | Delta(3,5)-Delta(2,4)-dienoyl-CoA isomerase, mitochondrial, EC 5.3.3.- | ECH1      | ECH1_HUMAN  | 11              | 10,21329378 | 0             | Yes                 | 1,66        | Yes                   | 1,49        | Yes                  | 1,56        | Yes                   | 1,60        |
| O75521                                     | Enoyl-CoA delta isomerase 2, EC 5.3.3.8                                | ECI2      | ECI2_HUMAN  | 11              | 1,824316086 | 0,01282397    | Yes                 | 1,37        | No                    | 1,21        | Yes                  | 1,41        | No                    | 1,31        |
| Carnitine-supported fatty acid transport   |                                                                        |           |             |                 |             |               | DOX_48h vs. Control |             | DOX_R 72h vs. Control |             | DOX_R 7d vs. Control |             | DOX_R 14d vs. Control |             |
| ID                                         | Protein name                                                           | Gene Name | UniProt ID  | Unique peptides | p-value     | ANOVA q-value | Significant         | Fold change | Significant           | Fold change | Significant          | Fold change | Significant           | Fold change |
| Q9UKG9                                     | Peroxisomal carnitine O-octanoyltransferase, COT, EC 2.3.1.137         | CROT      | OCTC_HUMAN  | 13              | 3,807935004 | 0,000967164   | No                  | 1,02        | Yes                   | -1,19       | Yes                  | 1,27        | Yes                   | 1,26        |
| O43772                                     | Mitochondrial carnitine/acylcarnitine carrier protein SLC25A20         | SLC25A20  | MCAT_HUMAN  | 7               | 1,64250647  | 0,018286195   | No                  | 1,32        | No                    | 1,61        | No                   | 2,11        | No                    | 2,12        |
| P23786                                     | Carnitine O-palmitoyltransferase 2, mitochondrial, EC 2.3.1.21         | CPT2      | CPT2_HUMAN  | 14              | 1,441183745 | 0,028492687   | No                  | 2,72        | No                    | 2,78        | Yes                  | 3,53        | No                    | 2,95        |
| P50416                                     | Carnitine O-palmitoyltransferase 1, liver isoform, CPT1-L, EC 2.3.1.21 | CPT1A     | CPT1A_HUMAN | 23              | 5,829134293 | 0,000586667   | No                  | 1,27        | Yes                   | 1,46        | Yes                  | 1,94        | Yes                   | 2,31        |
